# Supplementary material
Source: Springer Nature journal article supplement (https://www.springermedizin.de/resource/supplementary/13054_2011_9567_MOESM1_ESM.pdf/9706528)

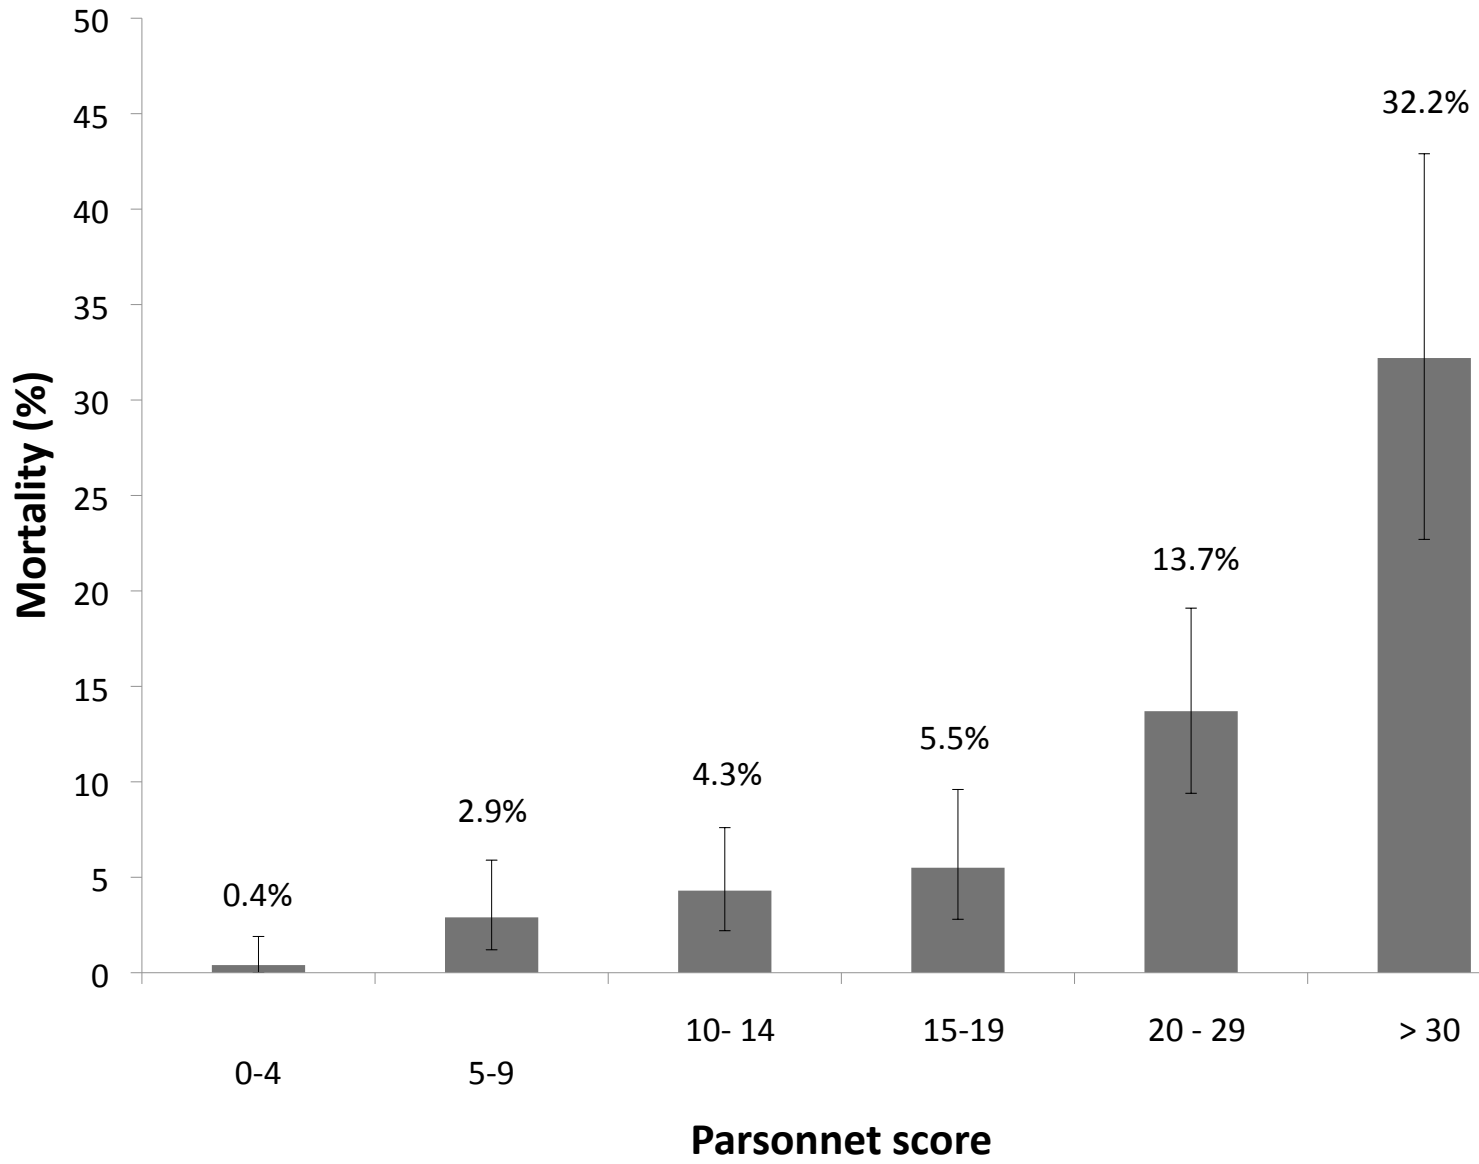

Supplement: MOESM1 [file 9706528]
